# Supplementary material for: X-ray-activated ultra-long UVA persistent luminescence from a Bi-doped perovskite LaGaO3 for photodynamic activation
Source: Royal Society of Chemistry journal article supplement (doi:10.1039/d3qi02604c), 2024-01-01
Supplement: d3qi02604c1.pdf [file d3qi02604c1.pdf]

## Supporting Information

### X-ray-activated Ultra-long UVA Persistent Luminescence from Bi-doped Perovskite LaGaO<sub>3</sub> for Photodynamic Activation

*Bo-Mei Liu, Yue Lin, Yingchun Liu, Shanqing Zhang, Jing Wang,\* Hui Zhang,\* and Jesse Zhu*

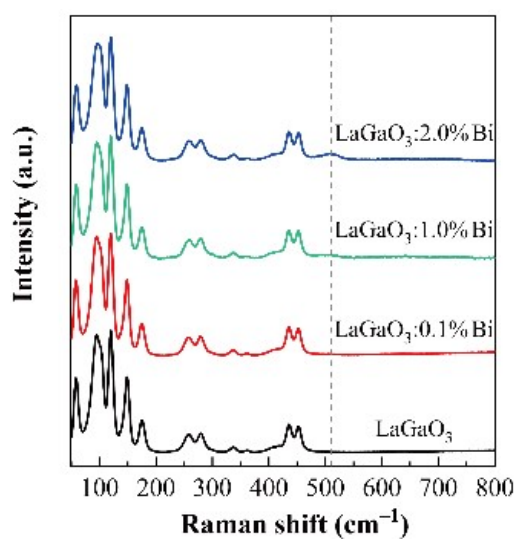

**Figure S1.** Normalized Raman spectra of undoped and Bi-doped LaGaO<sub>3</sub>.

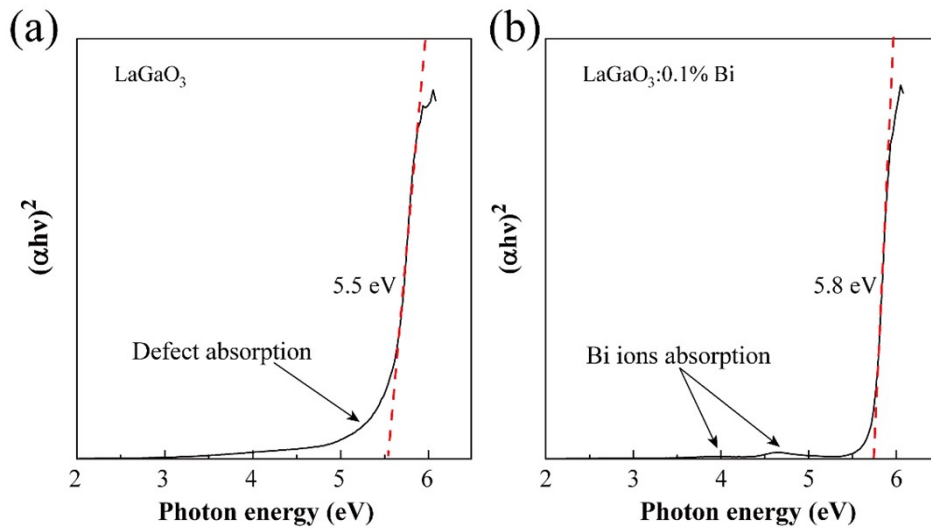

**Figure S2.** The plot of  $(\alpha h\nu)^2$  versus photon energy ( $h\nu$ ) for direct bandgap measurements of (a) LaGaO<sub>3</sub> host and (b) LaGaO<sub>3</sub>:0.1%Bi, respectively. Based on the absorption data of **Figure 6a**, the optical band gap has been calculated using the Wood and Tauc model. Note that the apparent absorption tail (Urbach tail) in the LaGaO<sub>3</sub> host comes from energy levels in defective crystalline,<sup>1</sup> which means that the existence of randomly distributed oxygen vacancies inevitably causes a certain degree of structural disorder.

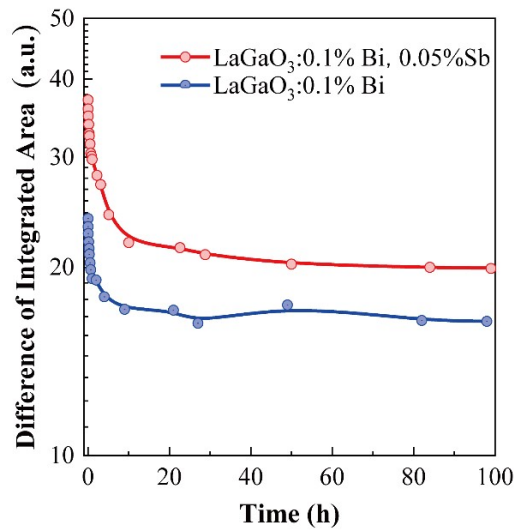

**Figure S3.** Time dependence of the difference of integrated absorption area ( $A_{\text{after irradiation}} - A_{\text{before irradiation}}$ ) for LaGaO<sub>3</sub>: 0.1%Bi based on the data of **Figure 5b**. The sample LaGaO<sub>3</sub>:0.1%Bi,0.05%Sb with the best PersL properties were tested at the same time.

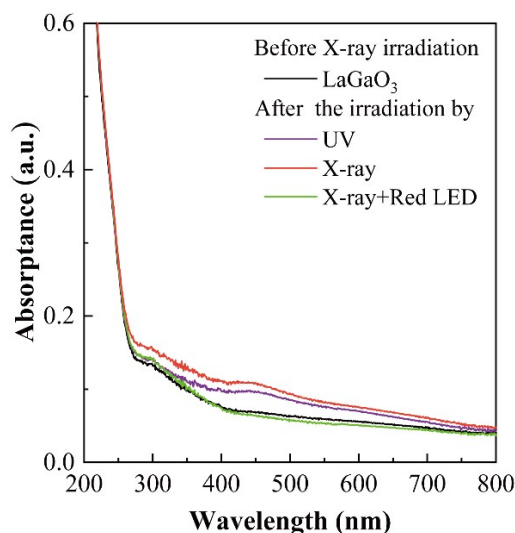

**Figure S4.** Absorption spectra of the as-obtained  $\text{LaGaO}_3$  powder after irradiation by different excitation sources for 5 min. Note: Similar thermal elimination by a red LED light can also be observed in  $\text{LaGaO}_3:0.1\% \text{Bi}$ .

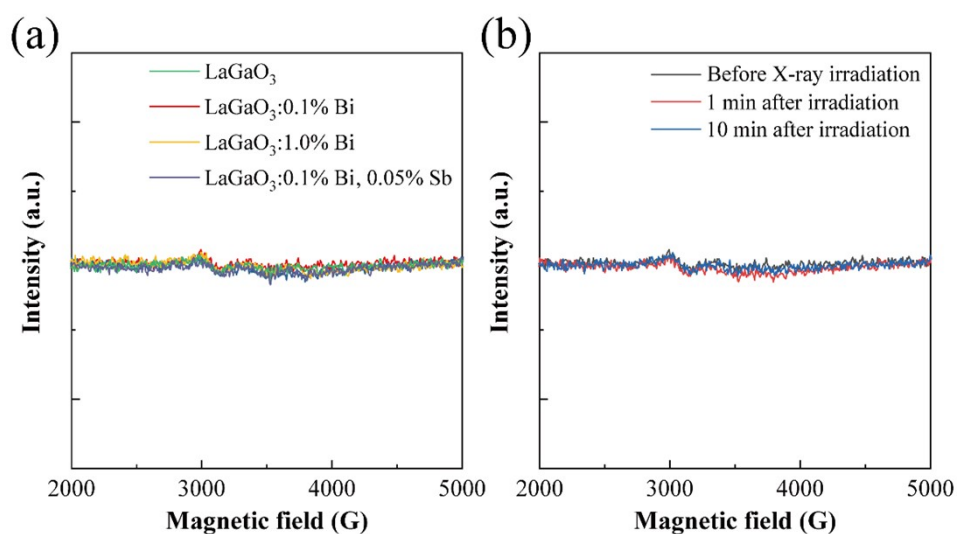

**Figure S5.** (a) EPR spectra of as-obtained undoped, Bi-doped, and Bi/Sb-codoped  $\text{LaGaO}_3$ . (b) EPR spectra of  $\text{LaGaO}_3:0.1\% \text{Bi}$  measured at RT before and after X-ray irradiation (5 min). Note that the  $\text{LaGaO}_3:\text{Bi}/\text{Sb}$ , which has the best PersL performance, also does not show any change during or after the X-ray irradiation, and the small peaks around  $G=3300$  in the spectra are due to the existence of trace impurity elements, such as Cr or Mn from the raw materials.

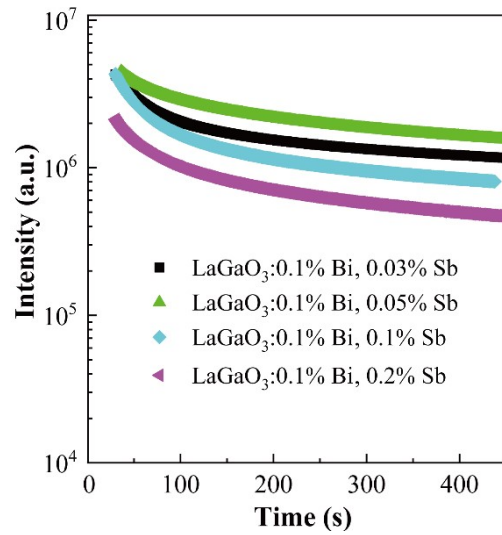

**Figure S6.** The persistent decay curves of LaGaO<sub>3</sub>:0.1%Bi codoped with different Sb monitored at 372 nm after X-ray irradiation for 5 min.

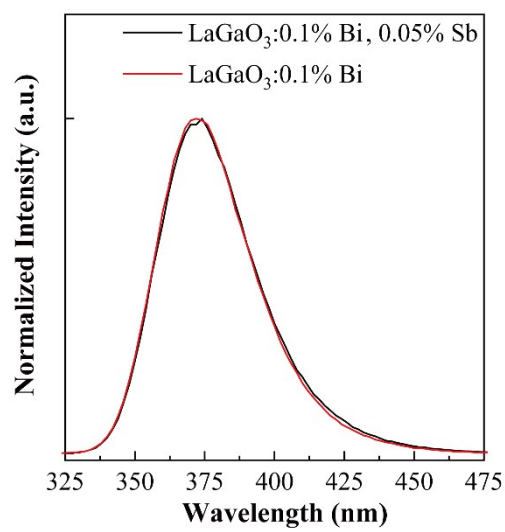

**Figure S7.** Emission spectra of LaGaO<sub>3</sub>:0.1%Bi,0.05%Sb and LaGaO<sub>3</sub>:0.1%Bi under the X-ray excitation.

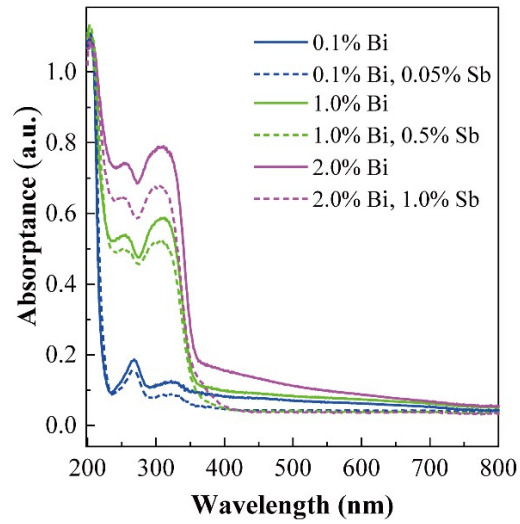

**Figure S8.** Absorption spectra of the as-synthesized Bi-doped and Bi/Sb codoped LaGaO<sub>3</sub> powder samples.

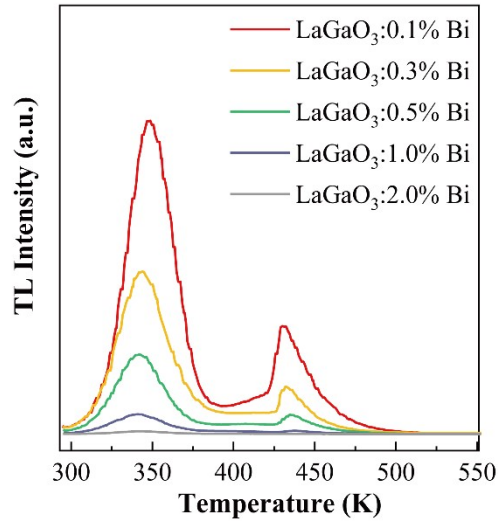

**Figure S9.** TL glow curves of LaGaO<sub>3</sub>:xBi ( $x=0.1-2\%$ ) phosphors at 10 s after X-ray charging for 5 min.

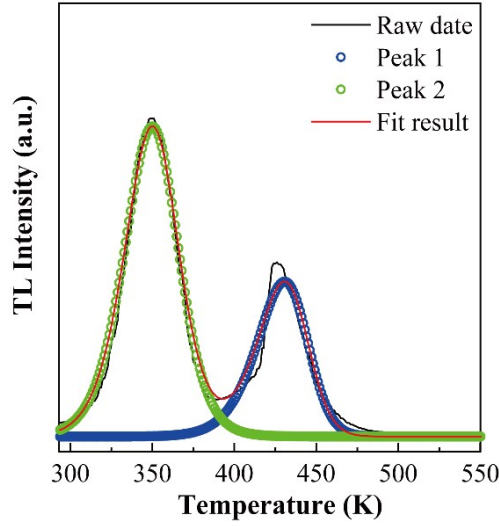

**Figure S10.** TL curves of LaGaO<sub>3</sub>:0.1%Bi,0.05%Sb that were resolved into two bands. The depths of the trap were estimated using the following equation:<sup>2</sup>

$$I(T) = n_0 S \exp\left(-\frac{E}{kT}\right) \left[ (b-1)(S/\beta) \int_{T_0}^T \exp\left(-\frac{E}{kT}\right) dT + 1 \right]$$

Where  $T$  is the temperature,  $n_0$  is the concentration of trapped charges at  $T = 0$ ,  $k$  is Boltzmann constant,  $\beta$  is the heating rate,  $E$  is the activation energy (which means the trap depth),  $S$  is frequency, and  $b$  is the order of kinetics. The calculated trap depths of the oxygen vacancy are 0.78 eV and 1.12 eV, respectively.

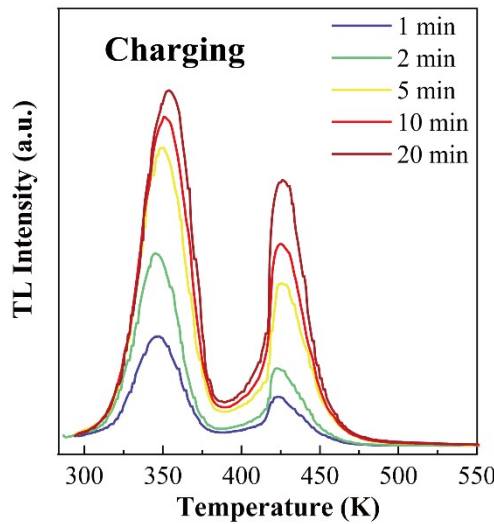

**Figure S11.** TL curves of the LaGaO<sub>3</sub>:0.1%Bi,0.05%Sb sample measured at 10 s after initially irradiated with an X-ray light for 1, 2, 5, 10, and 20 min.

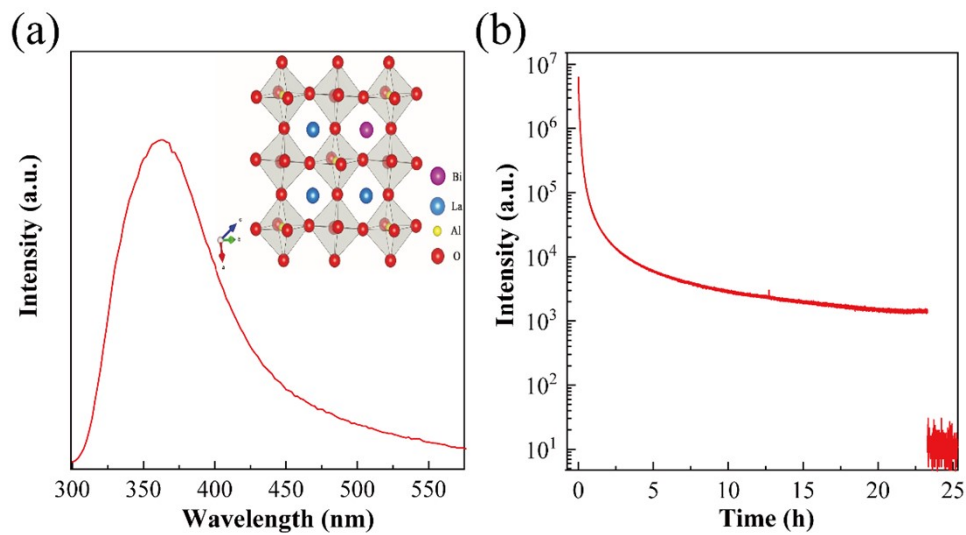

**Figure S12.** (a) Emission spectrum of  $\text{LaAlO}_3:1\%\text{Bi}$  under the X-ray radiation. Inset: schematic diagram of Bi-doped  $\text{LaAlO}_3$  structure. (b) PersL decay curve of  $\text{LaAlO}_3:1\%\text{Bi}$  monitored at 361 nm after X-ray radiation for 15 min.

## References

- [1] Hu, C. Q.; Meng, F. F.; Wen, M.; Gu, Z. Q.; Wang, J. Y.; Fan, X. F.; Zheng, W. T., Relationship between dielectric coefficient and Urbach tail width of hydrogenated amorphous germanium carbon alloy films. *Appl. Phys. Lett.* **2012**, *101* (4), 042109.
- [2] Bos, A. J. J., Theory of thermoluminescence. *Radiat. Meas.* **2006**, *41*, S45-S56.
